# Supplementary material for: Knowledge, Attitudes, and Practices of Spanish Midwives and Midwifery Students toward Oral Healthcare during Pregnancy
Source: MDPI journal article supplement (doi:10.3390/ijerph18116089), 2021-06-04
Supplement: s1 [file s1]

**Table S1. Conocimientos, actitudes y prácticas de matronas y residentes en enfermería obstétrico-ginecológica en materia de salud oral en mujeres embarazadas**

**PRIMERA PARTE: Aspectos sociodemográficos y otros datos de carácter personal.**

1. Edad: \_\_\_\_
  2. Sexo: Femenino ☐ Masculino ☐
  3. Sector en el que trabaja: Público ☐ Privado ☐ Ambos ☐
  4. Nivel asistencial en el que trabaja: Atención primaria ☐ Atención especializada ☐ Ambas ☐
  5. Situación laboral: Residente ☐ Matrona ☐
  6. Formación profesional: Graduado en enfermería ☐ Diplomado en enfermería ☐ Otra ☐
- 
7. Años de experiencia laboral como graduado/diplomado: \_\_\_\_
  8. Años de experiencia laboral como matrona: \_\_\_\_
  9. ¿Ha recibido formación sobre salud oral en mujeres embarazadas?: SI ☐ NO ☐
  10. ¿Cuántas de las mujeres embarazadas que atiende por semana refieren tener problemas de salud oral?: \_\_\_\_ De las mismas,
  11. ¿Cuántas deriva al odontólogo? \_\_\_\_
  12. ¿Informa o entrega algún material informativo (ej. folletos) sobre “salud oral en el embarazo” en alguna de las consultas de seguimiento a mujeres embarazadas? SI ☐ NO ☐

**SEGUNDA PARTE: Conocimientos sobre salud oral en el embarazo.** Por favor, indique con una “X” si son verdaderas o falsas las siguientes afirmaciones.

|                                                                                                                                                  | Verdadero                | Falso                    | No sabe/<br>no contesta  |
|--------------------------------------------------------------------------------------------------------------------------------------------------|--------------------------|--------------------------|--------------------------|
| 13. La salud oral de la madre puede influir en la salud del feto                                                                                 | <input type="checkbox"/> | <input type="checkbox"/> | <input type="checkbox"/> |
| 14. Las mujeres deben recibir atención dental preventiva durante el embarazo                                                                     | <input type="checkbox"/> | <input type="checkbox"/> | <input type="checkbox"/> |
| 15. El embarazo exacerba los problemas dentales existentes en la madre                                                                           | <input type="checkbox"/> | <input type="checkbox"/> | <input type="checkbox"/> |
| 16. El tabaquismo prenatal materno aumenta el riesgo de caries del futuro bebé                                                                   | <input type="checkbox"/> | <input type="checkbox"/> | <input type="checkbox"/> |
| 17. El embarazo se asocia con las siguientes manifestaciones orales:                                                                             |                          |                          |                          |
| a. Enfermedad periodontal: gingivitis (inflamación reversible de las encías) y/o periodontitis (destrucción de los tejidos de sostén del diente) | <input type="checkbox"/> | <input type="checkbox"/> | <input type="checkbox"/> |
| b. Granuloma piógeno o épulis gravídico                                                                                                          | <input type="checkbox"/> | <input type="checkbox"/> | <input type="checkbox"/> |
| c. Caries dental                                                                                                                                 | <input type="checkbox"/> | <input type="checkbox"/> | <input type="checkbox"/> |
| d. Erosión dentaria                                                                                                                              | <input type="checkbox"/> | <input type="checkbox"/> | <input type="checkbox"/> |
| e. Bruxismo (rechinar los dientes)                                                                                                               | <input type="checkbox"/> | <input type="checkbox"/> | <input type="checkbox"/> |

|                                                                                                                       |                          |                          |                          |
|-----------------------------------------------------------------------------------------------------------------------|--------------------------|--------------------------|--------------------------|
| 18. Durante el embarazo, el calcio de los dientes de la madre es liberado para el correcto desarrollo del futuro bebé | <input type="checkbox"/> | <input type="checkbox"/> | <input type="checkbox"/> |
| 19. La mala salud oral materna puede favorecer la aparición de caries dental en el/la niño/a                          | <input type="checkbox"/> | <input type="checkbox"/> | <input type="checkbox"/> |
| 20. La enfermedad periodontal se asocia con:                                                                          |                          |                          |                          |
| a. Muerte fetal                                                                                                       | <input type="checkbox"/> | <input type="checkbox"/> | <input type="checkbox"/> |
| b. Parto prematuro                                                                                                    | <input type="checkbox"/> | <input type="checkbox"/> | <input type="checkbox"/> |
| c. Aborto espontáneo                                                                                                  | <input type="checkbox"/> | <input type="checkbox"/> | <input type="checkbox"/> |
| d. Preeclampsia                                                                                                       | <input type="checkbox"/> | <input type="checkbox"/> | <input type="checkbox"/> |
| e. Bajo peso al nacer                                                                                                 | <input type="checkbox"/> | <input type="checkbox"/> | <input type="checkbox"/> |
| 21. No es seguro obtener radiografías dentales en mujeres embarazadas                                                 | <input type="checkbox"/> | <input type="checkbox"/> | <input type="checkbox"/> |
| 22. Los siguientes procedimientos dentales son seguros durante el embarazo:                                           |                          |                          |                          |
| a. Extracciones                                                                                                       | <input type="checkbox"/> | <input type="checkbox"/> | <input type="checkbox"/> |
| b. Anestesia local                                                                                                    | <input type="checkbox"/> | <input type="checkbox"/> | <input type="checkbox"/> |
| c. Endodoncia                                                                                                         | <input type="checkbox"/> | <input type="checkbox"/> | <input type="checkbox"/> |
| d. Raspado y alisado radicular                                                                                        | <input type="checkbox"/> | <input type="checkbox"/> | <input type="checkbox"/> |
| e. Limpieza con ultrasonidos                                                                                          | <input type="checkbox"/> | <input type="checkbox"/> | <input type="checkbox"/> |
| f. Higiene con cepillo y seda dental                                                                                  | <input type="checkbox"/> | <input type="checkbox"/> | <input type="checkbox"/> |
| 23. Las mujeres embarazadas sólo deben recibir atención dental de emergencia                                          | <input type="checkbox"/> | <input type="checkbox"/> | <input type="checkbox"/> |
| 24. Los siguientes tratamientos farmacológicos son seguros durante el embarazo:                                       |                          |                          |                          |
| a. Paracetamol                                                                                                        | <input type="checkbox"/> | <input type="checkbox"/> | <input type="checkbox"/> |
| b. Aspirina                                                                                                           | <input type="checkbox"/> | <input type="checkbox"/> | <input type="checkbox"/> |
| c. AINE (antiinflamatorio no esteroideo)                                                                              | <input type="checkbox"/> | <input type="checkbox"/> | <input type="checkbox"/> |
| d. Amoxicilina                                                                                                        | <input type="checkbox"/> | <input type="checkbox"/> | <input type="checkbox"/> |
| e. Eritromicina                                                                                                       | <input type="checkbox"/> | <input type="checkbox"/> | <input type="checkbox"/> |
| f. Doxiciclina                                                                                                        | <input type="checkbox"/> | <input type="checkbox"/> | <input type="checkbox"/> |
| 25. El tratamiento dental electivo debe retrasarse hasta después del embarazo                                         | <input type="checkbox"/> | <input type="checkbox"/> | <input type="checkbox"/> |

**TERCERA PARTE: Actitud relacionada con la promoción de la salud oral durante el embarazo.**

Por favor, en una escala de 1 a 5, indique su grado de acuerdo o desacuerdo con las siguientes afirmaciones, siendo 1 en total desacuerdo y 5 totalmente de acuerdo.

**Desacuerdo**                      **Acuerdo**

|                                                                                                                                                                  |                                                                                                                                                                |   |   |   |   |   |
|------------------------------------------------------------------------------------------------------------------------------------------------------------------|----------------------------------------------------------------------------------------------------------------------------------------------------------------|---|---|---|---|---|
| 26. La formación sobre el cuidado de la salud oral debería incluirse en el programa formativo de la especialidad de Enfermería Obstétrico-Ginecológica (matrona) | <table border="1" style="display: inline-table; text-align: center; width: 150px;"> <tr> <td>1</td> <td>2</td> <td>3</td> <td>4</td> <td>5</td> </tr> </table> | 1 | 2 | 3 | 4 | 5 |
| 1                                                                                                                                                                | 2                                                                                                                                                              | 3 | 4 | 5 |   |   |
| 27. Las Guías de Práctica Clínica de atención en el embarazo y puerperio deberían incluir aspectos relacionados con la promoción de la salud oral materna        | <table border="1" style="display: inline-table; text-align: center; width: 150px;"> <tr> <td>1</td> <td>2</td> <td>3</td> <td>4</td> <td>5</td> </tr> </table> | 1 | 2 | 3 | 4 | 5 |
| 1                                                                                                                                                                | 2                                                                                                                                                              | 3 | 4 | 5 |   |   |

28. La concienciación sobre la importancia de la higiene prenatal es un aspecto prioritario.

|   |   |   |   |   |
|---|---|---|---|---|
| 1 | 2 | 3 | 4 | 5 |
|---|---|---|---|---|

29. El mantenimiento de una correcta salud oral durante el embarazo es importante

|   |   |   |   |   |
|---|---|---|---|---|
| 1 | 2 | 3 | 4 | 5 |
|---|---|---|---|---|

30. Las matronas necesitan educación sobre salud oral en mujeres embarazadas ya que podría ser útil para su profesión

|   |   |   |   |   |
|---|---|---|---|---|
| 1 | 2 | 3 | 4 | 5 |
|---|---|---|---|---|

31. Las mujeres que quieren tener hijos deben hacer una revisión dental previa al embarazo

|   |   |   |   |   |
|---|---|---|---|---|
| 1 | 2 | 3 | 4 | 5 |
|---|---|---|---|---|

32. Las mujeres embarazadas son más proclives a buscar atención dental si los profesionales sanitarios se lo recomiendan

|   |   |   |   |   |
|---|---|---|---|---|
| 1 | 2 | 3 | 4 | 5 |
|---|---|---|---|---|

33. Actualmente existe una colaboración activa entre matronas y dentistas con respecto al cuidado dental para mujeres embarazadas

|   |   |   |   |   |
|---|---|---|---|---|
| 1 | 2 | 3 | 4 | 5 |
|---|---|---|---|---|

34. Preguntar a las mujeres embarazadas sobre la salud bucal está fuera de la práctica habitual de las matronas

|   |   |   |   |   |
|---|---|---|---|---|
| 1 | 2 | 3 | 4 | 5 |
|---|---|---|---|---|

35. Realizar un examen visual de la boca durante el embarazo está fuera de la práctica habitual de las matronas

|   |   |   |   |   |
|---|---|---|---|---|
| 1 | 2 | 3 | 4 | 5 |
|---|---|---|---|---|

36. Las exploraciones orales de mujeres embarazadas en visitas prenatales son importantes

|   |   |   |   |   |
|---|---|---|---|---|
| 1 | 2 | 3 | 4 | 5 |
|---|---|---|---|---|

37. Estoy segura/o de que tengo los conocimientos necesarios para aconsejar a las mujeres embarazadas sobre salud bucal

|   |   |   |   |   |
|---|---|---|---|---|
| 1 | 2 | 3 | 4 | 5 |
|---|---|---|---|---|

38. Estoy segura/o de que tengo los conocimientos necesarios para realizar exploraciones orales en mujeres embarazadas

|   |   |   |   |   |
|---|---|---|---|---|
| 1 | 2 | 3 | 4 | 5 |
|---|---|---|---|---|

39. Las matronas poco pueden hacer para mejorar la higiene y salud oral de las mujeres embarazadas

|   |   |   |   |   |
|---|---|---|---|---|
| 1 | 2 | 3 | 4 | 5 |
|---|---|---|---|---|

40. Las mujeres embarazadas se sienten cómodas cuando una matrona evalúa la salud bucal durante las consultas prenatales normales

|   |   |   |   |   |
|---|---|---|---|---|
| 1 | 2 | 3 | 4 | 5 |
|---|---|---|---|---|

41. La relación entre enfermedad periodontal y parto prematuro y/o bajo peso al nacer es demasiado débil para advertir a las mujeres embarazadas al respecto

|   |   |   |   |   |
|---|---|---|---|---|
| 1 | 2 | 3 | 4 | 5 |
|---|---|---|---|---|

42. La relación entre caries dental en las madres y en los bebés es demasiado débil para advertir a las mujeres embarazadas al respecto

|   |   |   |   |   |
|---|---|---|---|---|
| 1 | 2 | 3 | 4 | 5 |
|---|---|---|---|---|

43. Me preocupa que algo salga mal en un embarazo como consecuencia de un problema oral de la madre

|   |   |   |   |   |
|---|---|---|---|---|
| 1 | 2 | 3 | 4 | 5 |
|---|---|---|---|---|

44. Estoy interesada/o en obtener más información sobre salud oral en mujeres embarazadas

|   |   |   |   |   |
|---|---|---|---|---|
| 1 | 2 | 3 | 4 | 5 |
|---|---|---|---|---|

45. Estoy interesada/o en adquirir una mayor capacitación para realizar exploraciones orales en mujeres embarazadas

|   |   |   |   |   |
|---|---|---|---|---|
| 1 | 2 | 3 | 4 | 5 |
|---|---|---|---|---|

**CUARTA PARTE: Prácticas en promoción de la salud oral en mujeres gestantes.** Por favor, señala del 1 al 5 el valor de la escala que más se identifique con tu práctica: 1. Nunca; 2. Casi nunca; 3. A veces; 4. Casi siempre; 5. Siempre.

Nunca                      Siempre

←                                      →

46. Pregunto a las mujeres embarazadas sobre su salud oral.

|   |   |   |   |   |
|---|---|---|---|---|
| 1 | 2 | 3 | 4 | 5 |
|---|---|---|---|---|

47. Discuto con mujeres embarazadas la importancia de la salud oral.

|   |   |   |   |   |
|---|---|---|---|---|
| 1 | 2 | 3 | 4 | 5 |
|---|---|---|---|---|

48. Pregunto a las mujeres embarazadas sobre sus prácticas de higiene oral.

|   |   |   |   |   |
|---|---|---|---|---|
| 1 | 2 | 3 | 4 | 5 |
|---|---|---|---|---|

49. Realizo una exploración oral de las mujeres embarazadas como parte de la atención prenatal.

|   |   |   |   |   |
|---|---|---|---|---|
| 1 | 2 | 3 | 4 | 5 |
|---|---|---|---|---|

50. Aconsejo a las mujeres embarazadas que retrasen las visitas al dentista hasta después del embarazo.

|   |   |   |   |   |
|---|---|---|---|---|
| 1 | 2 | 3 | 4 | 5 |
|---|---|---|---|---|

51. Aconsejo a las mujeres que visiten al dentista antes de quedarse embarazadas.

|   |   |   |   |   |
|---|---|---|---|---|
| 1 | 2 | 3 | 4 | 5 |
|---|---|---|---|---|

52. Informo a las mujeres embarazadas sobre la asociación entre una mala salud periodontal y resultados de nacimiento negativos.

|   |   |   |   |   |
|---|---|---|---|---|
| 1 | 2 | 3 | 4 | 5 |
|---|---|---|---|---|

53. Informo a las mujeres embarazadas sobre prevención y riesgo de transmisión de caries entre madre e hija/o.

|   |   |   |   |   |
|---|---|---|---|---|
| 1 | 2 | 3 | 4 | 5 |
|---|---|---|---|---|

**QUINTA PARTE: Barreras para la promoción del cuidado oral en mujeres embarazadas.** Por favor, en una escala de 1 a 5, indique su grado de acuerdo o desacuerdo con las siguientes afirmaciones, siendo 1 en total desacuerdo y 5 totalmente de acuerdo.

**Desacuerdo**                      **Acuerdo**  


54. Las consultas prenatales son demasiado breves como para que las matronas hagan educación para la salud oral a mujeres embarazadas

|   |   |   |   |   |
|---|---|---|---|---|
| 1 | 2 | 3 | 4 | 5 |
|---|---|---|---|---|

55. Las matronas desconocen la importancia de la salud bucal durante el embarazo.

|   |   |   |   |   |
|---|---|---|---|---|
| 1 | 2 | 3 | 4 | 5 |
|---|---|---|---|---|

56. Las guías de práctica clínica de atención en el embarazo y puerperio de uso en España no abordan el cuidado de la salud bucal.

|   |   |   |   |   |
|---|---|---|---|---|
| 1 | 2 | 3 | 4 | 5 |
|---|---|---|---|---|

57. Las matronas no tienen la formación necesaria sobre salud oral en el embarazo.

|   |   |   |   |   |
|---|---|---|---|---|
| 1 | 2 | 3 | 4 | 5 |
|---|---|---|---|---|

58. Las matronas no están capacitadas para realizar exploraciones orales en mujeres embarazadas.

|   |   |   |   |   |
|---|---|---|---|---|
| 1 | 2 | 3 | 4 | 5 |
|---|---|---|---|---|

59. Los tratamientos de patologías orales en mujeres embarazadas son muy caros

|   |   |   |   |   |
|---|---|---|---|---|
| 1 | 2 | 3 | 4 | 5 |
|---|---|---|---|---|

60. Las mujeres embarazadas no demandan atención porque creen que hacer algún tratamiento durante el embarazo puede afectar al niño/a

|   |   |   |   |   |
|---|---|---|---|---|
| 1 | 2 | 3 | 4 | 5 |
|---|---|---|---|---|

61. El cuidado de la salud oral no es una prioridad para las mujeres embarazadas

|   |   |   |   |   |
|---|---|---|---|---|
| 1 | 2 | 3 | 4 | 5 |
|---|---|---|---|---|

62. Los odontólogos son reticentes a tratar a las mujeres embarazadas.

|   |   |   |   |   |
|---|---|---|---|---|
| 1 | 2 | 3 | 4 | 5 |
|---|---|---|---|---|

63. Los tratamientos dentales pueden propiciar un parto prematuro.

|   |   |   |   |   |
|---|---|---|---|---|
| 1 | 2 | 3 | 4 | 5 |
|---|---|---|---|---|

64. Las recomendaciones sobre cuidado oral en el embarazo no son unánimes.

|   |   |   |   |   |
|---|---|---|---|---|
| 1 | 2 | 3 | 4 | 5 |
|---|---|---|---|---|
